# Supplementary material for: Enhanced biocompatibility in poly(3-hexylthiophene)-based organic thin-film transistors upon blending with poly(2-(2-acetoxyacetyl)ethyl methacrylate)
Source: Royal Society of Chemistry journal article supplement (doi:10.1039/c5ra21465c), 2016-01-01
Supplement: c5ra21465c1.pdf [file c5ra21465c1.pdf]

## **Supplementary Information**

### **Characterization**

#### **Field-effect scanning electron microscope (FE-SEM)**

Since the annealed P3HT is not soluble in tetrahydrofuran (THF) but PHEMAAA is well-dissolved in THF, the selective dissolution of the PHEMAAA in the 25/75 blend film was successfully performed. The 25/75 blend film morphologies before and after dissolution of PHEMAAA were characterized using a FE-SEM. (JEOL JSM-6701F)

#### **Contact angle**

The contact angles of deionized water and diiodomethane (MI) were measured at room temperature and ambient relative humidity using a Kruss DSA 10 contact angle analyzer interfaced to drop shape analysis software. The Owens-Wendt-Rabel-Kaelble (OWRK) method [1] was used to calculate the surface energy of the polymer films.

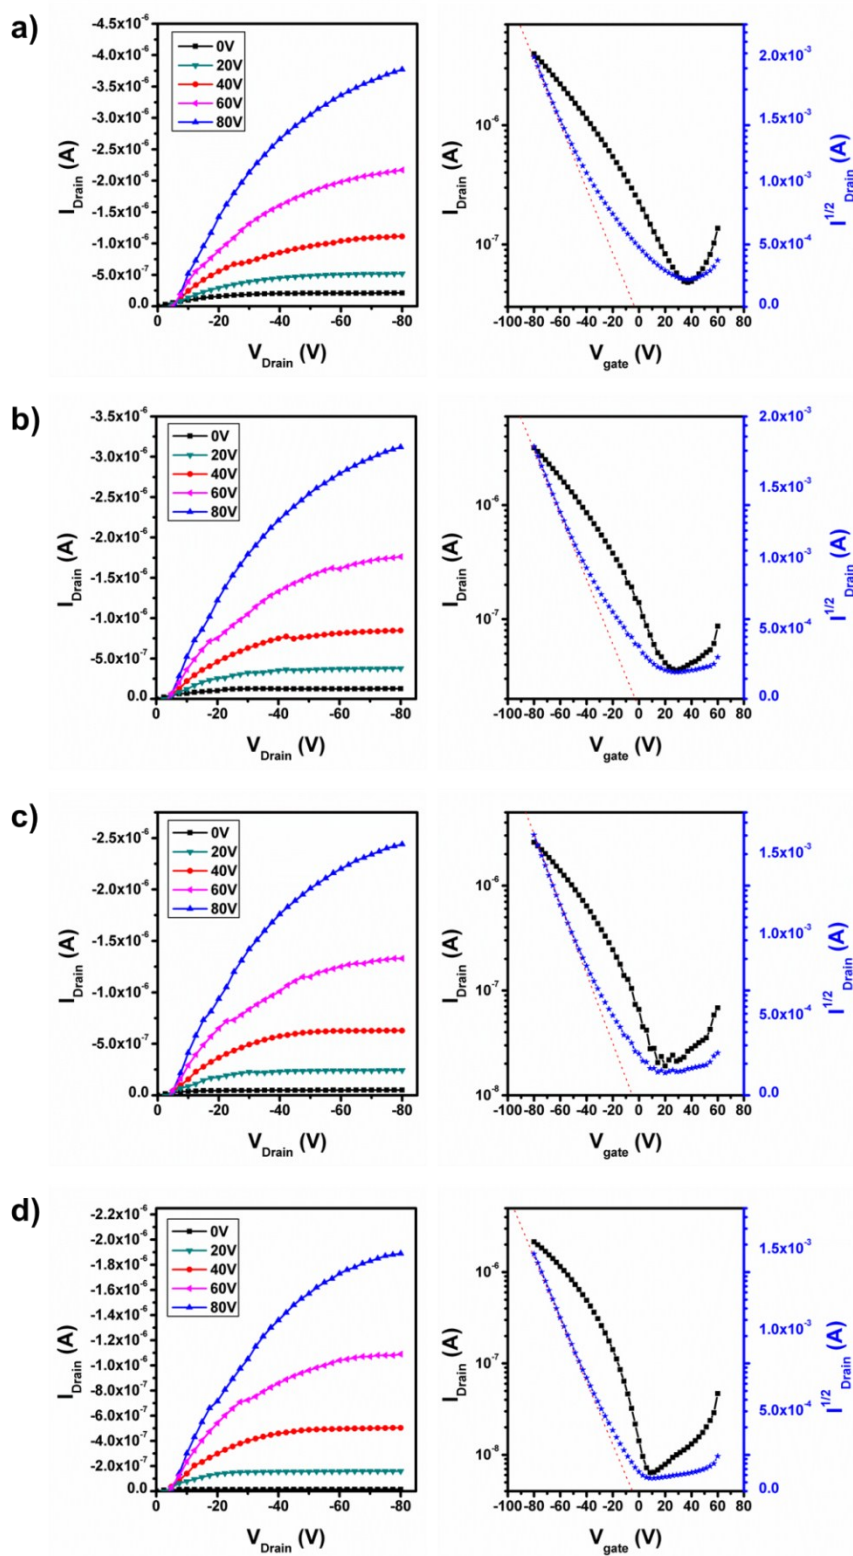

**Fig. S1** Output and transfer curves obtained from a) P3HT, b) 75/25 blend, c) 50/50 blend, and d) 25/75blend.

**Table S1.** The  $d$ -spacings of P3HT/PHEMAAA blend films determined from GIWAXD measurements.

| $d$ - spacing         | P3HT   | P3HT/PHEMAAA (wt%) |        |        |
|-----------------------|--------|--------------------|--------|--------|
|                       |        | 75/25              | 50/50  | 25/75  |
| Lamellar spacing      | 16.3 Å | 16.8 Å             | 16.3 Å | 16.8 Å |
| $\pi$ - $\pi$ spacing |        | 4.2 Å              |        |        |

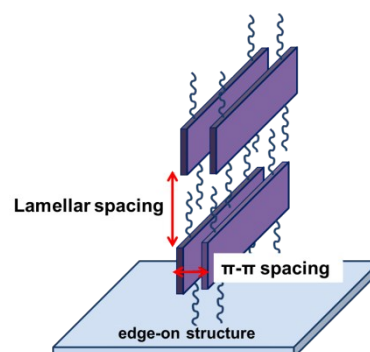

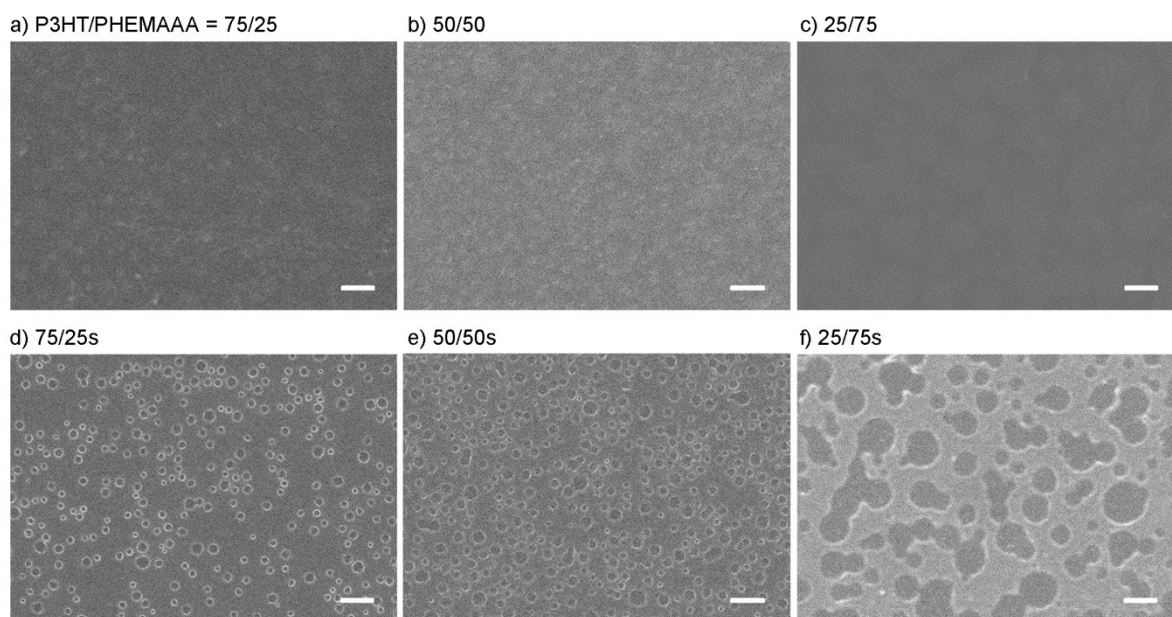

Fig. S2FE-SEM images of P3HT/PHEMAAA blend films a)-c) before and d)-f) after selective dissolution of PHEMAAA part using THF. (scale bar = 1  $\mu\text{m}$ ) The connective networks of P3HT domain were observed from all blend surfaces by measuring the film morphologies obtained after selective dissolution of PHEMAAA.

**Table S2.** The contact angles of deionized water and DIM measured on the P3HT and PHEMAAA films and the surface energies of the polymers.

| Sample         | Contact angles [degrees] <sup>a</sup> |                        | Surface energy<br>(mN/m) <sup>b</sup> |
|----------------|---------------------------------------|------------------------|---------------------------------------|
|                | DI-water                              | Diiodomethane<br>(DIM) |                                       |
| <b>P3HT</b>    | 104.0 (0.8)                           | 49.9 (1.2)             | 34.3                                  |
| <b>PHEMAAA</b> | 72.7 (1.1)                            | 36.7 (0.9)             | 44.6                                  |

<sup>a</sup>Standard deviations are given in parentheses. <sup>b</sup>Calculated using Owens-Wendt-Rable-Kaelble method.

## References

1. D.K. Owens, R.C. Wendt, et al., J. Appl. Polym. Sci., 1969, 13, 1741
